# Supplementary material for: Acinetobacter baumannii Isolates from COVID-19 Patients in a Hospital Intensive Care Unit: Molecular Typing and Risk Factors
Source: MDPI journal article supplement (doi:10.3390/microorganisms10040722), 2022-03-28
Supplement: s1 [file s1]

**Supplementary Table S1.** Classification of antibiotic agents into their respective antibiotic class.

| Antibiotic class                  | Antibiotic agent            |
|-----------------------------------|-----------------------------|
| Aminoglycosides                   | Gentamicin                  |
|                                   | Amikacin                    |
|                                   | Paromomycin                 |
| Carbapenems                       | Ertapenem                   |
|                                   | Imipenem                    |
|                                   | Meropenem                   |
|                                   |                             |
| Extended spectrum cephalosporines | Cefotaxime                  |
|                                   | Ceftazidime                 |
|                                   | Cefepime                    |
|                                   | Ceftriaxone                 |
|                                   | Ceftazidime/Avibactam       |
|                                   | Cefoperazone                |
|                                   | Ceftolozane/Tazobactam      |
|                                   |                             |
| Glycopeptides                     | Vancomycin                  |
|                                   | Teicoplanin                 |
| Daptomycin                        | Daptomycin                  |
| Linezolid                         | Linezolid                   |
| Penicillin                        | Amoxicillin/Clavulanic acid |
|                                   | Ampicillin/Sulbactam        |
|                                   | Piperacillin/Tazobactam     |
| Colistin                          | Colistin                    |

**Supplementary Table S2.** Multinomial logistic regression model for *A. baumannii* colonization or infection among SARS-CoV-2 patients admitted to the intensive care unit of the Umberto I teaching hospital of Rome between 1 March 2020 and 28 February 2021.

|                                                                | Colonization<br>by <i>A. baumannii</i> |                 | Infection<br>by <i>A. baumannii</i> |                 |
|----------------------------------------------------------------|----------------------------------------|-----------------|-------------------------------------|-----------------|
|                                                                | RRR (95% CI)                           | <i>p</i> -Value | RRR (95% CI)                        | <i>p</i> -Value |
| Age (years)                                                    | 0.99 (0.96-1.02)                       | 0.399           | 1.03 (0.98-1.07)                    | 0.246           |
| Sex (male)                                                     | 1.02 (0.45-2.30)                       | 0.959           | 1.72 (0.64-4.60)                    | 0.283           |
| Pre-existing comorbidity (yes)                                 | 1.00 (0.46-2.20)                       | 0.993           | 0.60 (0.22-1.62)                    | 0.311           |
| SAPS II score                                                  | 1.00 (0.96-1.04)                       | 0.845           | 0.93 (0.87-0.99)                    | 0.016           |
| Mechanical ventilation, days                                   | 1.00 (0.95-1.05)                       | 0.929           | 1.04 (0.98-1.10)                    | 0.213           |
| Previous consumption of carbapenems (yes)                      | 4.36 (1.67-11.39)                      | 0.003           | 4.05 (1.24-13.20)                   | 0.020           |
| Previous consumption of extended spectrum cephalosporins (yes) | 1.46 (0.57-3.72)                       | 0.430           | 0.36 (0.07-1.81)                    | 0.215           |
| Previous consumption of glycopeptides (yes)                    | 0.69 (0.29-1.63)                       | 0.403           | 1.17 (0.39-3.51)                    | 0.780           |
| Previous consumption of macrolides (yes)                       | 1.97 (0.92-4.23)                       | 0.080           | 1.49 (0.55-4.01)                    | 0.429           |
| Previous consumption of oxazolidinones (yes)                   | 0.60 (0.16-2.34)                       | 0.465           | 1.93 (0.44-8.50)                    | 0.385           |
| Previous consumption of penicillins (yes)                      | 1.25 (0.54-2.86)                       | 0.605           | 0.66 (0.22-1.96)                    | 0.453           |

RRR: Relative Risk Ratio. CI: Confidence Interval. SAPS: Simplified Acute Physiology Score.
